# Supplementary material for: Synergistic Effects of Family Members as Caregivers after Acute Hemorrhagic Stroke in Jeju: A Cohort Study in Jeju, Korea
Source: Research Square preprint supplement (doi:10.21203/rs.3.rs-8242128/v1), 2025-12-22
Supplement: Supplementary file 1 [file 87af89b18667cf9e39e5a41f.xlsx]

## Sheet: Sheet1
Table 2.
Best (n=16)
Caregiver	Dependent→Independent (n=11)	Upgrade 2 Score (n=5)
Daugther	7	0
Spouse	4	0
Patient	0	4
Son	0	0
Daughter-in law	0	1
Brother	0	0
