# Supplementary material for: Synergistic Effects of Family Members as Caregivers after Acute Hemorrhagic Stroke in Jeju: A Cohort Study in Jeju, Korea
Source: Research Square preprint supplement (doi:10.21203/rs.3.rs-8242128/v1), 2025-12-22
Supplement: Supplementary file 2 [file f356e9045a0ce03b51a86eeb.docx]

| Table 1. |  | |  |  |  |  |  |
| --- | --- | --- | --- | --- | --- | --- | --- |
|  |  | |  |  |  |  |  |
|  | Best(n=16) | | Better(n=8) | Steady(n=9) | Worse(n=1) | Worst(n=3) | P value |
| Hematoma volume | 20±19.0 | 8.9±16.6 | | 33±14.0 | 3.2 | 5.13±3.50 | P=0.044 |
| Hematoma location |  | |  |  |  |  |  |
| Basal ganglia | 5 | | 3 | 5 | 0 | 0 |  |
| Thalamus | 5 | | 1 | 2 | 0 | 2 |  |
| Lobe | 4 | | 3 | 2 | 1 | 0 |  |
| Cerebellum | 2 | | 1 | 0 | 0 | 1 |  |
| Extension to ventricle |  | |  |  |  |  | P=0.438 |
| Yes | 4 | | 2 | 4 | 0 | 0 |  |
| No | 12 | | 6 | 5 | 1 | 3 |  |
| Smoking |  | |  |  |  |  | P=0.075 |
| Yes | 4 | | 5 | 4 | 0 | 0 |  |
| No | 12 | | 3 | 5 | 1 | 3 |  |
| Risk factor  HTN, Smoking, Heavy alcohol, Dysplipidemia, Anticoagulant, Antiplatelet, Chronic kidney disease, Multiple birth, Harsh working environment | | | | | | | |
| Yes | 33 | | 16 | 15 | 2 | 5 |  |
| No | 3 | | 0 | 1 | 0 | 1 |  |
| Operation |  | |  |  |  |  | P=0.008 |
| Yes | 9 | | 1 | 4 | 0 | 0 |  |
| No | 7 | | 7 | 5 | 1 | 3 |  |
| Length of stay in the ICU | 5.1±4.2 | | 3.8±7.0 | 11.8±13.4 | 1 | 4.5±5.5 | P=0.224 |
| Reoperation |  | |  |  |  |  | P=0.448 |
| Yes | 1 | | 1 | 0 | 0 | 0 |  |
| No | 15 | | 7 | 9 | 1 | 3 |  |
| Transfer to the Rehabilitation meidicine | | | | | | | P=0.112 |
| Yes | 12 | | 2 | 4 | 0 | 2 |  |
| No | 4 | | 6 | 5 | 1 | 1 |  |
| Total length of stay | 39.4±21.5 | | 23.1±29.3 | 37.2±21.9 | 7 | 32.3±2.5 | P=0.355 |
| Type of discharge |  | |  |  |  |  | P=0.012 |
| Home | 9 | | 7 | 1 | 1 | 1 |  |
| Transfer | 7 | | 1 | 8 | 0 | 2 |  |
| Complication |  | |  |  |  |  | P=0.129 |
| Pneumonia | 1 | | 0 | 2 | 0 | 0 |  |
| UTI | 1 | | 0 | 0 | 0 | 0 |  |
| Bleeding (SAH, ICH) | 2 | | 0 | 0 | 0 | 0 |  |

| Table 2. |  |  |
| --- | --- | --- |
|  |  |  |
| Best (n=16) | | |
| Caregiver | Dependent→Independent  (n=11) | Upgrade 2 Score (n=5) |
| Daugther | 7 | 0 |
| Spouse | 4 | 0 |
| Patient | 0 | 4 |
| Son | 0 | 0 |
| Daughter-in law | 0 | 1 |
| Brother | 0 | 0 |
